# Supplementary material
Source: Springer Nature journal article supplement (https://www.springermedizin.de/resource/supplementary/12887_2005_91_MOESM3_ESM.pdf/9477246)
Supplement: MOESM3 [file 9477246]

0.05 0.14 0.37 1.00 2.72 7.39 20.09

| Author                            | Child<br>Risk % | RR (95%CI)        | Adult<br>Risk % | RR (95%CI)       |
|-----------------------------------|-----------------|-------------------|-----------------|------------------|
| <b>Asthma (Age 18 yrs cutoff)</b> |                 |                   |                 |                  |
| Abramson**                        | 61              | 0.50 [0.38,0.66]  | 66              | 0.78 [0.46,1.35] |
| Rowe A**                          | 79              | 0.76 [0.65,0.89]  | 42              | 0.69 [0.46,1.03] |
| Edmonds**                         | 23              | 0.07 [0.004,1.12] | 24              | 0.34 [0.14,0.83] |
| Rowe B*,**                        | 97              | 0.70 [0.55,0.90]  | 53              | 0.72 [0.38,1.36] |
| Cates                             | 44              | 0.62 [0.38,1.01]  | 41              | 0.83 [0.53,1.29] |

**Asthma (Age 14 yrs cutoff)**

|            |    |                  |    |                  |
|------------|----|------------------|----|------------------|
| Abramson** | 61 | 0.50 [0.38,0.66] | 77 | 0.73 [0.50,1.07] |
|------------|----|------------------|----|------------------|

**Brain Injury (Age 18 yrs cutoff)**

|           |   |                   |    |                  |
|-----------|---|-------------------|----|------------------|
| Alderson* | 0 | 3.00 [0.15,59.89] | 45 | 0.75 [0.38,1.48] |
|-----------|---|-------------------|----|------------------|

**Brain Injury (Age 14 yrs cutoff)**

|             |    |                   |    |                  |
|-------------|----|-------------------|----|------------------|
| Schierhout* | 13 | 1.30 [0.82,2.08]  | 26 | 0.71 [0.39,1.30] |
| Roberts     | 27 | 1.00 [0.49,2.04]  | 53 | 1.18 [0.79,1.75] |
| Alderson*   | 0  | 3.00 [0.15,59.89] | 41 | 0.85 [0.61,1.19] |

0.05 0.14 0.37 1.00 2.72 7.39 20.09

Favours Child

Favours Adult
